# Supplementary material for: UTexas Aptamer Database: the collection and long-term preservation of aptamer sequence information
Source: PubMed Central journal article supplement (PMC10767891; doi:10.1093/nar/gkad959), 2023-10-30
Supplement: gkad959_supplemental_file.pdf [file gkad959_supplemental_file.pdf]

## Supplementary Data

# UTexas Aptamer Database: The Collection and Long-Term Preservation of Aptamer Sequence Information

### AUTHORS

Ali Askari<sup>1</sup>, Sumedha Kota<sup>1</sup>, Hailey Ferrell<sup>1</sup>, Shriya Swamy<sup>1</sup>, Kayla S. Goodman<sup>1</sup>, Christine C. Okoro<sup>1</sup>, Isaiah C. Spruell Crenshaw<sup>1</sup>, Daniela K. Hernandez<sup>1</sup>, Taylor E. Oliphant<sup>1</sup>, Akshata A. Badrayani<sup>1</sup>, Andrew D. Ellington<sup>3,4</sup>, Gwendolyn M. Stovall<sup>1,2,3\*</sup>

<sup>1</sup> Freshman Research Initiative, The University of Texas, Austin, Texas, 78712, USA

<sup>2</sup> High School Research Initiative, The University of Texas, Austin, Texas, 78712, USA

<sup>3</sup> Institute for Molecular Biosciences, The University of Texas, Austin, Texas, 78712, USA

<sup>4</sup> Center for Systems and Synthetic Biology, The University of Texas, Austin, Texas, 78712, USA

\* To whom correspondence should be addressed. Tel: 512-471-4049; Fax: 512-232-1045; Email: gwenstovall@utexas.edu

### Disclaimer:

The information provided in this analysis is based on data available as of July 2023 and may not reflect the most current data. Therefore, any decisions or actions taken based on this information should be carefully evaluated in light of more recent and relevant data.

# Table of Content

|                                                                                                           |    |
|-----------------------------------------------------------------------------------------------------------|----|
| Table S1: A summary of aptamer databases in order of launch date. ....                                    | 3  |
| Table S2: Formulas used in the Google Sheets (e.g., calculate GC content, sequence length, etc.).....     | 4  |
| Figure S1: A screenshot of the UTexas Aptamer dataset in Google Sheets.....                               | 5  |
| Figure S2: Aptamer binding affinity vs. pH. ....                                                          | 6  |
| Figure S3: Aptamer binding affinity in nM vs. GC%. ....                                                   | 6  |
| Figure S4: Aptamer binding affinity in nM vs. GC% (boxplot). ....                                         | 7  |
| Figure S5: Frequency of each base per aptamer sequence. ....                                              | 7  |
| Figure S6: Number of aptamer sequences and aptamer publications per year.....                             | 8  |
| Figure S7: Count of aptamer publications by journals, according to the UTexas Aptamer dataset.....        | 8  |
| Figure S8: Summary of the nucleic acid type of aptamer sequence found in the UTexas Aptamer Database..... | 9  |
| Figure S9: Count of each nucleic acid type in the UTexas Aptamer Database. ....                           | 9  |
| Figure S10: Aptamer binding affinity vs. aptamer C%-base count.....                                       | 10 |
| Figure S11: Aptamer binding affinity in nM vs. C% (boxplot).....                                          | 10 |
| Figure S12: Aptamer binding affinity vs G%-Base count in the aptamer sequence. ....                       | 11 |
| Figure S13: Aptamer binding affinity in nM vs. G% (boxplot).....                                          | 11 |
| Figure S14: Nucleic acid type versus aptamer affinity (boxplot).....                                      | 12 |
| Figure S15: Aptamer binding affinity versus sequence length. ....                                         | 12 |
| Figure S16: Aptamer binding affinity versus pool random region.....                                       | 13 |
| Figure S17: Length of pool random region versus aptamer affinity (boxplot). ....                          | 13 |
| Figure S18: Divalent salt included in binding buffer versus aptamer affinity (boxplot).....               | 14 |
| Figure S19: Buffer type versus aptamer binding affinity (boxplot).....                                    | 14 |
| Table S3: Comparison of Aptamer Databases: Examination of those sequences that differed..                 | 21 |

| Database Name     | Institution                                                                            | Aptamer Sequences      | Current Status                                                               | First launched or date of publication | Reference                        |
|-------------------|----------------------------------------------------------------------------------------|------------------------|------------------------------------------------------------------------------|---------------------------------------|----------------------------------|
| SELEX_DB          | Institute of Cytology and Genetics                                                     | 116                    | Last updated 2015                                                            | 2000                                  | Ponomarenko, et al., 2000 & 2001 |
| Aptamer Database* | The University of Texas at Austin                                                      | 239                    | Inactive                                                                     | 2004                                  | Lee, et al., 2004                |
| RiboaptDB*        | University of Southern Mississippi                                                     | 3842                   | Inactive                                                                     | 2006                                  | Thodima, et al., 2006            |
| HTPSELEX          | Swiss Institute for Experimental Cancer Research and Swiss Institute of Bioinformatics | Not determined         | Last updated September 2012                                                  | 2006                                  | Jagannathan, et al., 2006        |
| Apta-Index™       | Aptagen                                                                                | 783 (as of April 2023) | Active and updated                                                           | 2008                                  | No paper to date.                |
| Aptamer Base*     | Carleton University                                                                    | 2334                   | Inactive (CSV file with aptamer sequence information is available on GitHub) | 2012                                  | Cruz-Toledo, et al., 2012        |
| Aptabase          | Indian Institute of Technology Guwahati                                                | 605                    | Periodically updated                                                         | 2021                                  | No paper to date.                |

Table S1: A summary of aptamer databases in order of launch date.

\*Indicates the database management included mechanisms to check the accuracy of the sequences (e.g., “Aptamer Base” relied on users' wiki-contributions to correct or augment the dataset).

| Function                                            | Formula                                                                                                                                                                                                                                                                                                                                                                                                              | Field used                                                                                                 | Conditional formatting or Cell |
|-----------------------------------------------------|----------------------------------------------------------------------------------------------------------------------------------------------------------------------------------------------------------------------------------------------------------------------------------------------------------------------------------------------------------------------------------------------------------------------|------------------------------------------------------------------------------------------------------------|--------------------------------|
| Finding duplicates                                  | =countif(D:D,D1)>1                                                                                                                                                                                                                                                                                                                                                                                                   | Link to PubMed Entry (green), Journal DOI (light orange), Citation (Light blur), Aptamer sequence (yellow) | Conditional formatting         |
| Finding duplicate in across multiple sheets/column. | Info Collect-setup<br>=match(\$E1:\$E, indirect("Database!D2:D"),0)<br><br>Database Sheet<br>=match(\$E2:\$E, indirect("Database!D2:D"),0)                                                                                                                                                                                                                                                                           | DOI. This was used to see if the doi in Info collect-setup sheet is the same as main database.             | Conditional formatting         |
| Sequence Length                                     | =(LEN(I2)- LEN(SUBSTITUTE(I2,"G","")))+<br>(LEN(I2)-LEN(SUBSTITUTE(I2,"C",""))<br>+(LEN(I2)-LEN(SUBSTITUTE(I2,"A",""))<br>+(LEN(I2)-LEN(SUBSTITUTE(I2,"T","")))+<br>(LEN(I2)-LEN(SUBSTITUTE(I2,"U","")) +<br>(LEN(I2)- LEN(SUBSTITUTE(I2,"g","")))+<br>(LEN(I2)-LEN(SUBSTITUTE(I2,"c",""))<br>+(LEN(I2)-LEN(SUBSTITUTE(I2,"a",""))<br>+(LEN(I2)-LEN(SUBSTITUTE(I2,"t","")))+<br>(LEN(I2)-LEN(SUBSTITUTE(I2,"u",""))) | Sequence length                                                                                            | Cell                           |
| GC content calculation                              | =((LEN(I35)- LEN(SUBSTITUTE(I35,"G",""))<br>)+ (LEN(I35)-<br>LEN(SUBSTITUTE(I35,"C",""))<br>)+ (LEN(I35)- LEN(SUBSTITUTE(I35,"g",""))<br>)+ (LEN(I35)- LEN(SUBSTITUTE(I35,"c",""))<br>))/J35                                                                                                                                                                                                                         | GC content                                                                                                 | Cell                           |

Table S2: Formulas used in the Google Sheets (e.g., calculate GC content, sequence length, etc.).

**a.**

| Name of Information Collectors [Initials of reviewers] | Year of Paper | Link to PubMed Entry                                                                              | Journals          | Journal DOI                                                                                               | Citation        | Type of Nucleic Acid | Name of Aptamer | Target          | Aptamer Sequence   | Sequence Length | GC Content | Affinity                 | Kd (nM) | Pool Type       | Pool Random Region | Binding Buffer/Conditions |
|--------------------------------------------------------|---------------|---------------------------------------------------------------------------------------------------|-------------------|-----------------------------------------------------------------------------------------------------------|-----------------|----------------------|-----------------|-----------------|--------------------|-----------------|------------|--------------------------|---------|-----------------|--------------------|---------------------------|
| Ali Askari [ISC]                                       | 2008          | <a href="https://pubmed.ncbi.nlm.nih.gov/18111111/">https://pubmed.ncbi.nlm.nih.gov/18111111/</a> | J Agric Food Chem | <a href="https://doi.org/10.1021/jf071634h">https://doi.org/10.1021/jf071634h</a>                         | Cruz-Aguado     | ssDNA                | 112             | Ochratoxin A    | 5'TGGTGCGCTAGGTCA  | 61              | 59%        | Kd: 0.36                 | 0.36    | 5-TGGTGCGGTAC   | 30                 | Selection buffer (SB)     |
| Isaac Weislow [AA] [KG]                                | 2000          | <a href="https://pubmed.ncbi.nlm.nih.gov/10811111/">https://pubmed.ncbi.nlm.nih.gov/10811111/</a> | Bioorg Med Chem   | <a href="https://doi.org/10.1016/S0958-2019(00)00111-1">https://doi.org/10.1016/S0958-2019(00)00111-1</a> | Fukusaki, E.    | ssDNA                | Chi No 52       | Poly-beta-1,4   | 5'TAGGGAATTCGTCG   | 105             | 60%        | Binding Efficiency       | N/A     | 5'-TAGGGAATTCG  | 59                 | 100 mM NaCl, 100 mM MgCl  |
| Sumedha Kota [PA]                                      | 2000          | <a href="https://pubmed.ncbi.nlm.nih.gov/10811111/">https://pubmed.ncbi.nlm.nih.gov/10811111/</a> | Bioorg Med Chem   | <a href="https://doi.org/10.1016/S0958-2019(00)00111-1">https://doi.org/10.1016/S0958-2019(00)00111-1</a> | Okazawa, A.     | ssDNA                | 26              | Hematoporphyrin | 5'TAGGGAATTCGTCG   | 102             | 67%        | Kd: 1.6x10 <sup>-6</sup> | 1600    | 5'-TAGGGAATTCG  | 59                 | 100 mM Trisacetate        |
| Sumedha Kota [KG]                                      | 1996          | <a href="https://pubmed.ncbi.nlm.nih.gov/8811111/">https://pubmed.ncbi.nlm.nih.gov/8811111/</a>   | J Clin Invest     | <a href="https://doi.org/10.1172/JCI111111">https://doi.org/10.1172/JCI111111</a>                         | Hicke, B. J., V | ssDNA                | LD20111         | L-selectin-IgG  | 5'TAGCCAAGGTAACCAG | 49              | 47%        | Not reported             | N/A     | 5'-CTACCTACGATC | 40                 | 20 mM Hepes, pH 7.4       |

**b.**

| Pool Random Region | Binding Buffer/Conditions                     | Divalent Salt | Type of the buffer | pH  | Molecular weight of target | Application as quoted in the referenced paper                                                                                                                                   | Post-selex modifications to the aptamer | Additional Relevant Information | Serial Number | Corresponding Author Name, email address | please fill out the form for any feedbacks/comments                       | Aptamer Cross Referencing (Check Aptamer Chemistry, Affinity, Length, GC content, sequence) |
|--------------------|-----------------------------------------------|---------------|--------------------|-----|----------------------------|---------------------------------------------------------------------------------------------------------------------------------------------------------------------------------|-----------------------------------------|---------------------------------|---------------|------------------------------------------|---------------------------------------------------------------------------|---------------------------------------------------------------------------------------------|
| 30                 | Selection buffer (SB MgCl/CaCl)               |               | Tris Buffers       | 7.0 | Not reported               | Research and Detection: "This work describes the identification of an aptamer that binds to the library with a K <sub>d</sub> of 0.36 nM." [Cruz-Aguado et al., 2008]           |                                         |                                 | 10,000,654    | Penner, G, E-mail: gpenner@uconn.edu     | <a href="https://forms.gle/5dTpApdGpdT">https://forms.gle/5dTpApdGpdT</a> | 5'dTpApdGpdT                                                                                |
| 59                 | 100 mM NaCl, 100 mM MgCl                      |               | Tris Buffers       | 8.0 | Not reported               | Diagnostic: "Oligosaccharide antigens play essential biological roles in many biological processes." [Fukusaki et al., 2000]                                                    | Not applicable                          | G-cluster motif                 | 10,000,317    | Fukusaki E, fukusaki@uconn.edu           | <a href="https://forms.gle/5dTpApdGpdT">https://forms.gle/5dTpApdGpdT</a> | 5'dTpApdGpdT                                                                                |
| 59                 | 100 mM Trisacetate                            | None          | Tris Buffers       | 8.0 | Not reported               | Detection: "In the present study, we selected single-stranded DNA aptamers that bind to hemaphysalis with a K <sub>d</sub> of 1.6 x 10 <sup>-6</sup> M." [Okazawa et al., 2000] | Not applicable                          |                                 | 10,000,301    | Kobayashi, A, kobayashi@uconn.edu        | <a href="https://forms.gle/5dTpApdGpdT">https://forms.gle/5dTpApdGpdT</a> | 5'dTpApdGpdT                                                                                |
| 40                 | 20 mM Hepes, pH 7.4                           | MgCl/CaCl     | Other Buffers      | 7.5 | Not reported               | Therapeutic: "Aptamers that bind with nanomolar affinity to L-selectin's lectin domain, prevent L-selectin-mediated cell adhesion." [Hicke et al., 1996]                        | Not applicable                          |                                 | 10,000,139    | Parma, D, parma@uconn.edu                | <a href="https://forms.gle/5dTpApdGpdT">https://forms.gle/5dTpApdGpdT</a> | 5'dGpdTpdGpc                                                                                |
| 35                 | CE Buffer (30 mM NaCl, 10 mM Tris, 1 mM EDTA) | None          | PBS/pho            | 7.5 | Not reported               | Diagnostic and Therapeutic: "Alpha-fetoprotein (AFP) is a liver cancer marker." [Guo et al., 2010]                                                                              | Not applicable                          |                                 | 10,001,063    | Guo, W, guowei@uconn.edu                 | <a href="https://forms.gle/5dTpApdGpdT">https://forms.gle/5dTpApdGpdT</a> | 5'dGpdTpdGpc                                                                                |

Figure S1: A screenshot of the UTexas Aptamer dataset in Google Sheets.

The name of information collectors and initials of reviewers were recorded in the first column to track systematic errors across the database. Bright blue indicate there is more than one entry from one publication. Figure 1 B is the continuation of Figure 1 A.

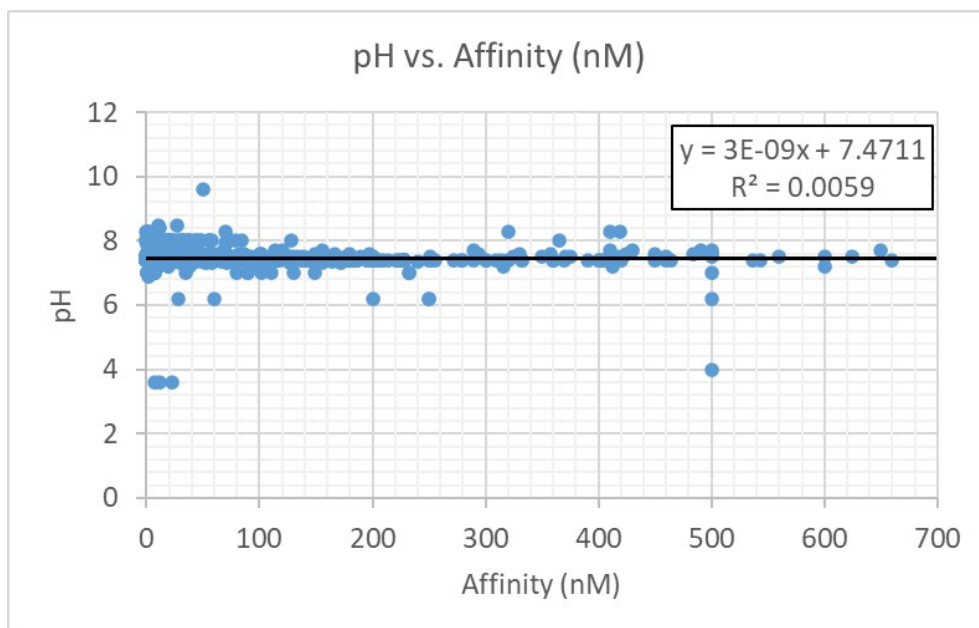

Figure S2: Aptamer binding affinity vs. pH.

The relationship between these two variables is assessed using the line of best fit. With an  $R^2$  value of 0.0059, there is no correlation between the two variables. The y-axis was adjusted to a zoom level that selectively displays data up to 700 nM.

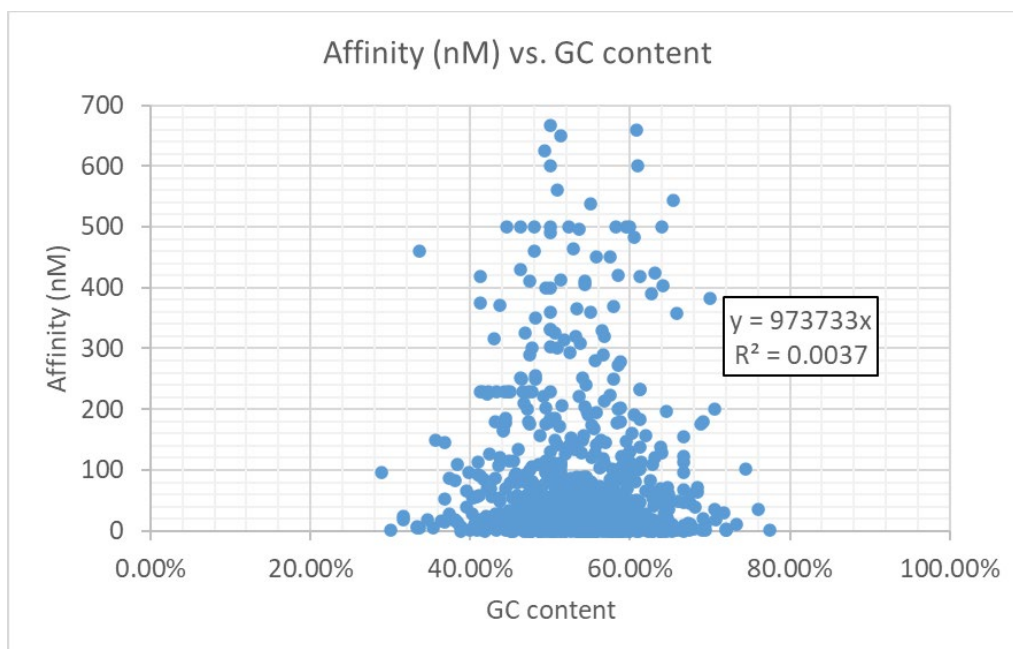

Figure S3: Aptamer binding affinity in nM vs. GC%.

The relationship between these two variables is assessed using the line of best fit. With an  $R^2$  value of 0.0037, there is no correlation between the two variables. The y-axis was adjusted to a zoom level that selectively displays data up to 700 nM, and the intercept was set at zero.

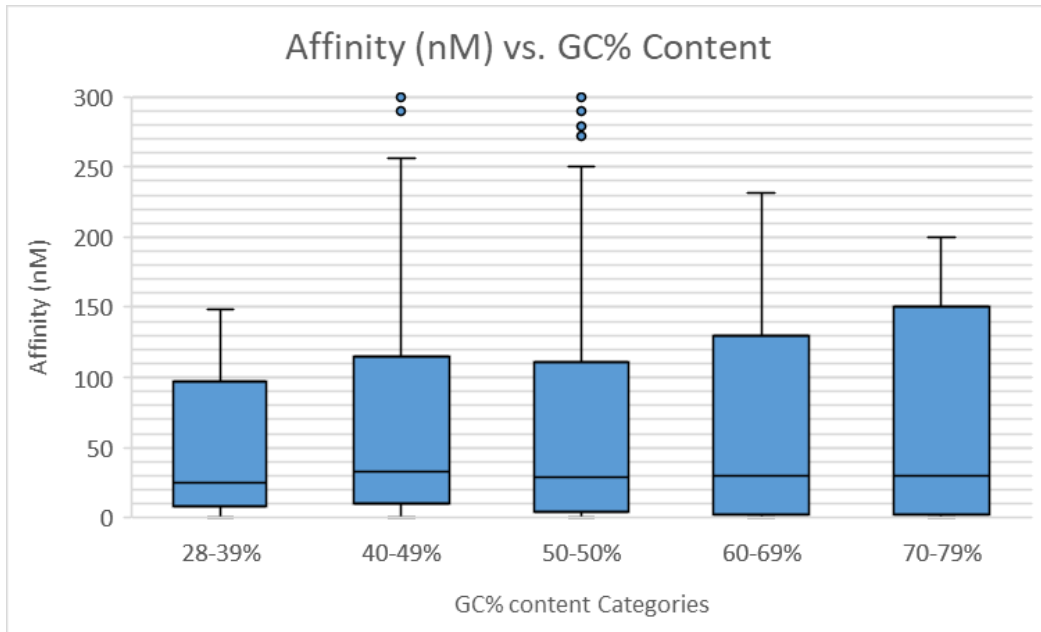

Figure S4: Aptamer binding affinity in nM vs. GC% (boxplot). There are five GC% categories to assess whether the specific range of GC% affect affinity. The y-axis was adjusted to a zoom level that selectively displays data up to 300 nM.

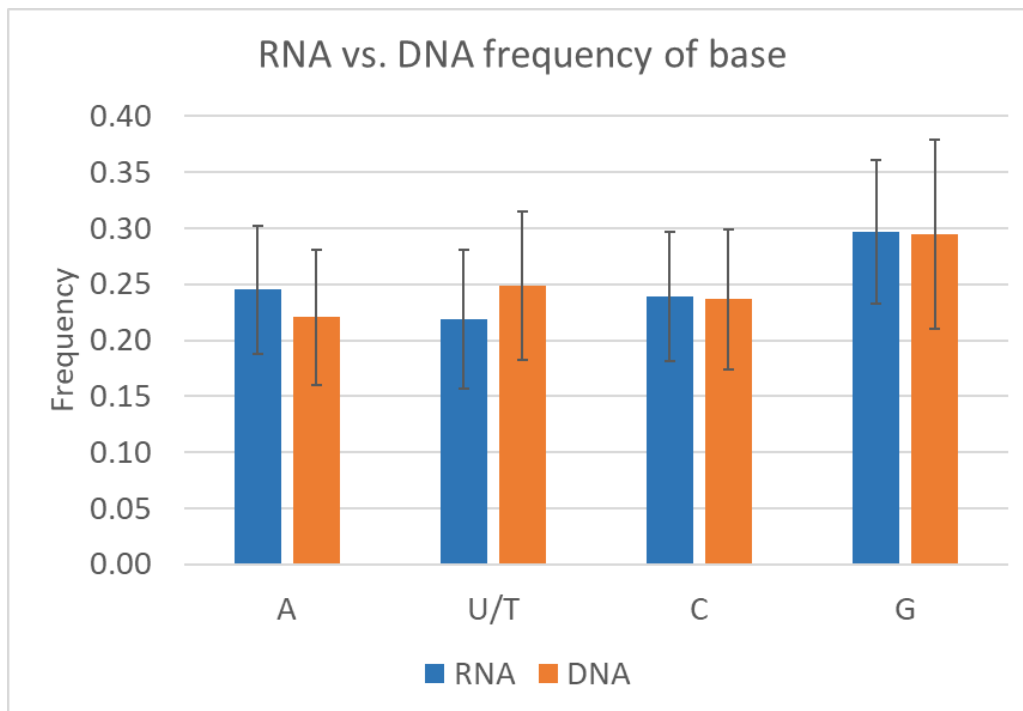

Figure S5: Frequency of each base per aptamer sequence.

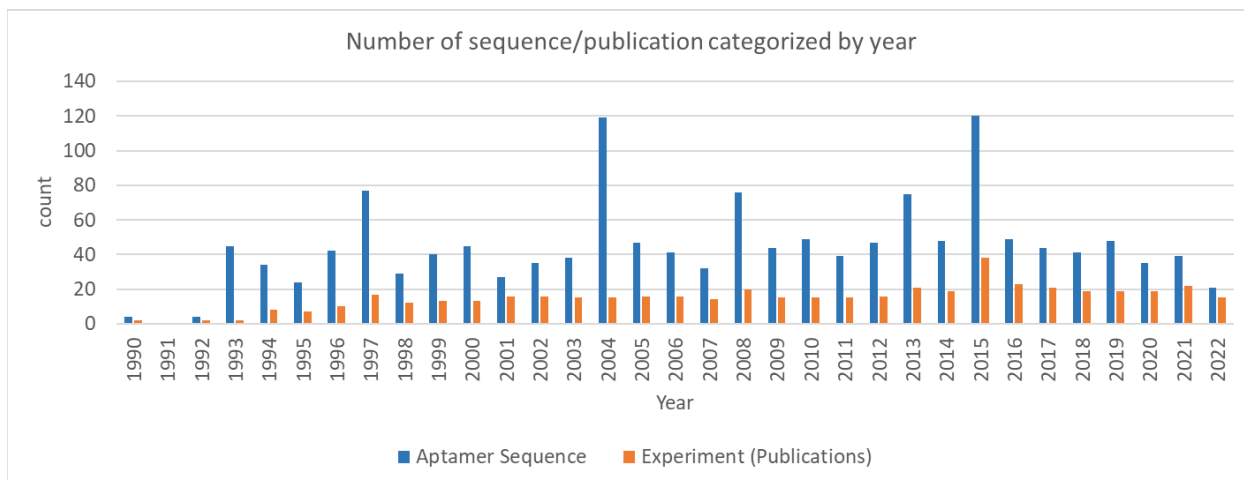

Figure S6: Number of aptamer sequences and aptamer publications per year.

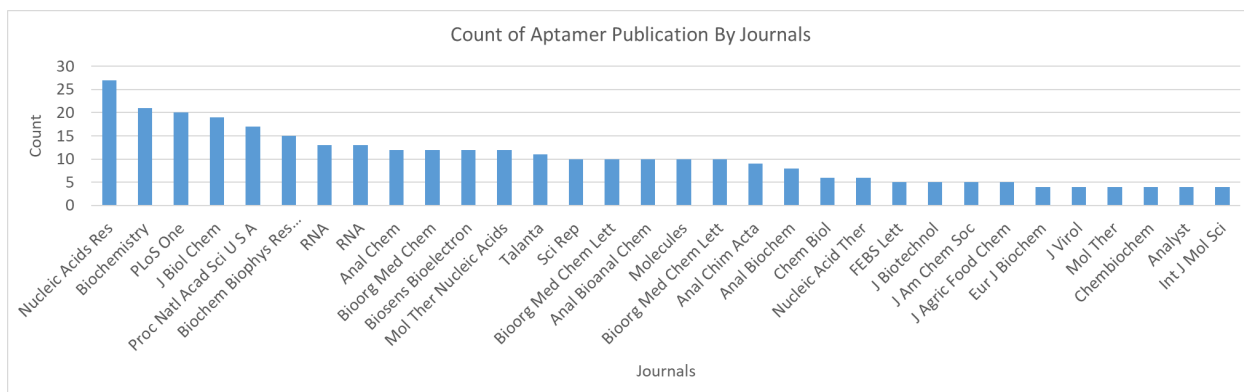

Figure S7: Count of aptamer publications by journals, according to the UTexas Aptamer dataset.



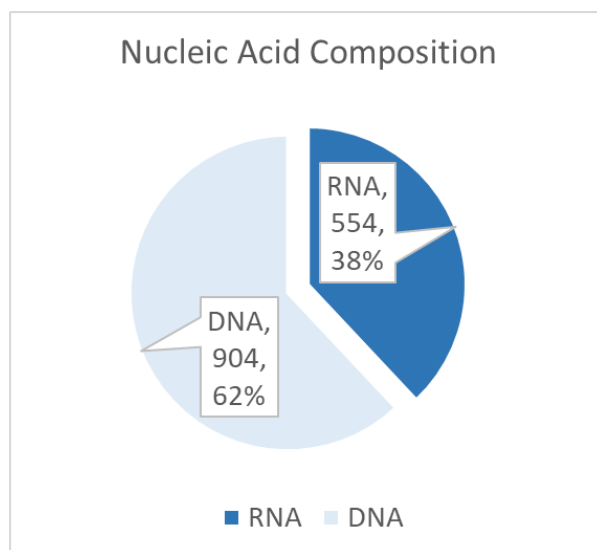

Figure S8: Summary of the nucleic acid type of aptamer sequence found in the UTexas Aptamer Database.

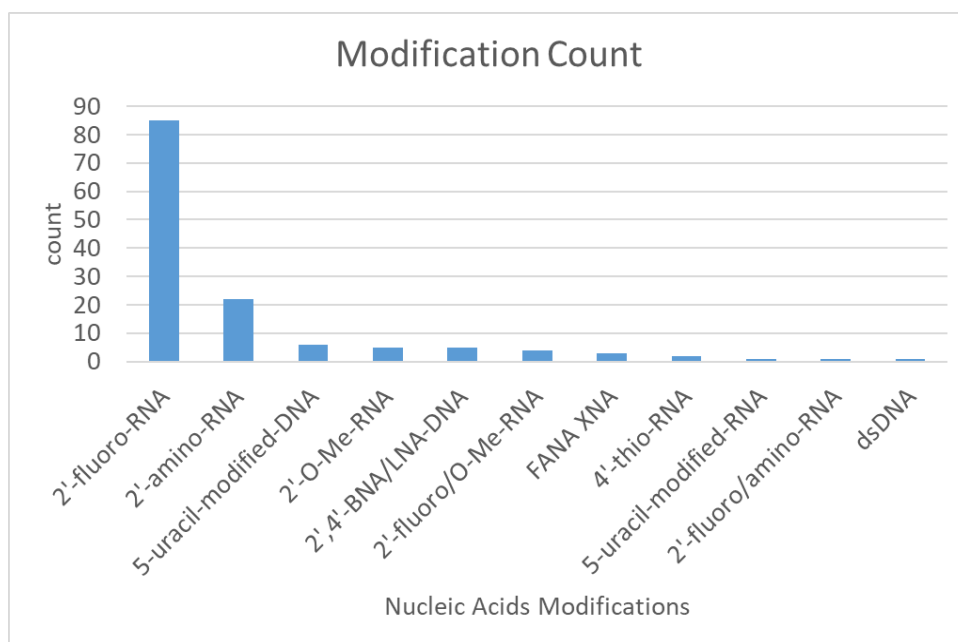

Figure S9: Count of each nucleic acid type in the UTexas Aptamer Database.

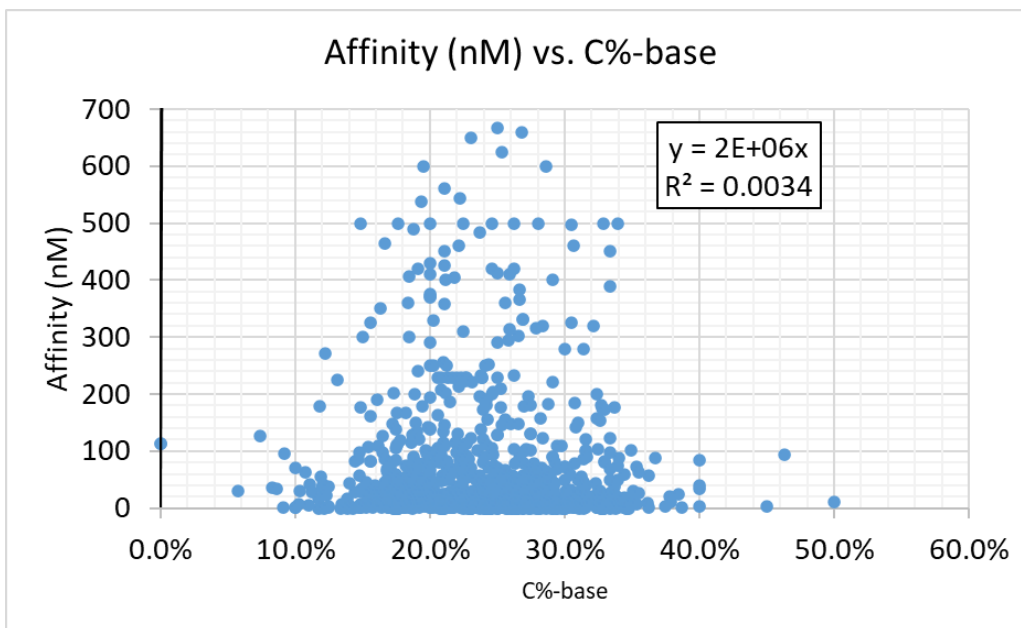

Figure S10: Aptamer binding affinity vs. aptamer C%-base count.

The relationship between these two variables is assessed using the line of best fit. With an  $R^2$  value of 0.0034, there is no correlation between the two variables. The y-axis was adjusted to a zoom level that selectively displays data up to 700 nM, and the intercept was set at zero.

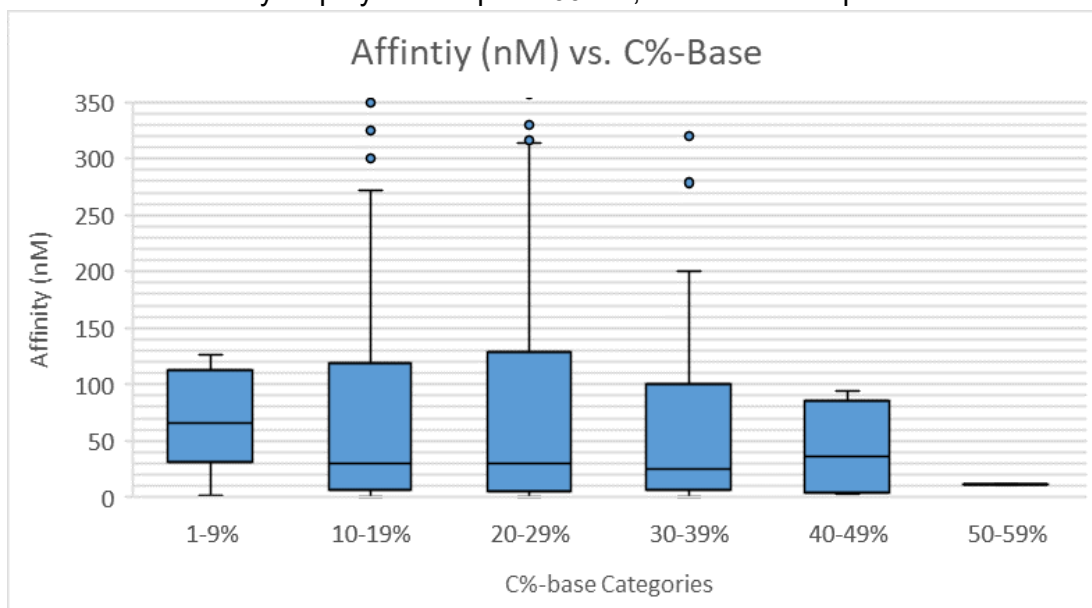

Figure S11: Aptamer binding affinity in nM vs. C% (boxplot).

There are six C% categories to asses whether the specific range of C% affect affinity. Categories 1-9%, 40-49%, and 50-59% have less than 20 sample sizes. The y-axis was adjusted to a zoom level that selectively displays data up to 350 nM.

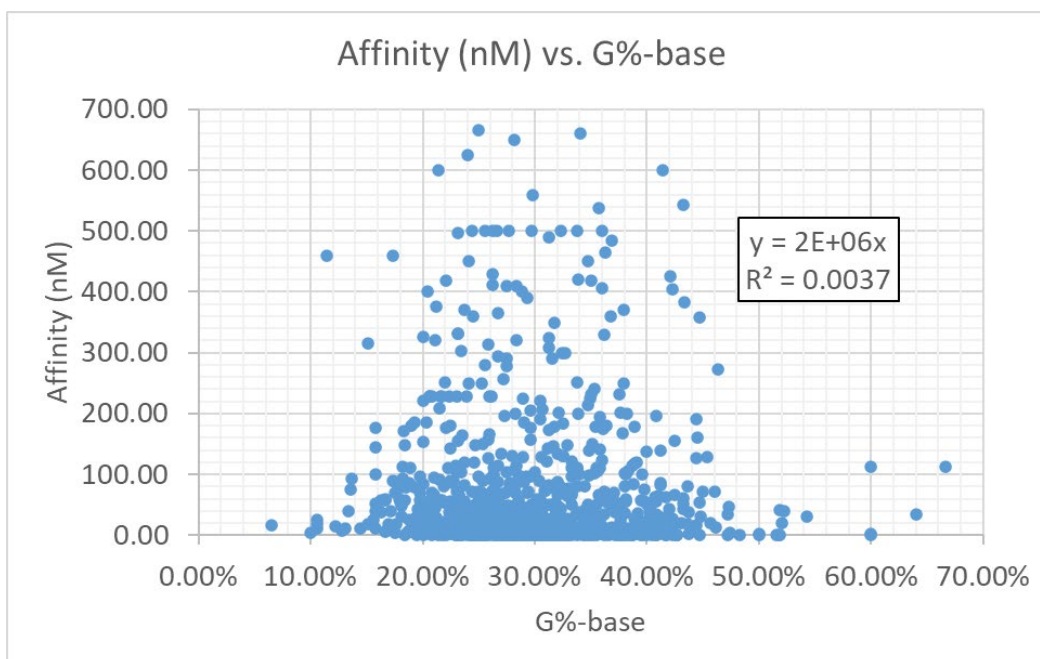

Figure S12: Aptamer binding affinity vs G%-Base count in the aptamer sequence. The relationship between these two variables is assessed using the line of best fit. With an  $R^2$  value of 0.0037, there is no correlation between the two variables. The y-axis was adjusted to a zoom level that selectively displays data up to 700 nM, and the intercept was set at zero.

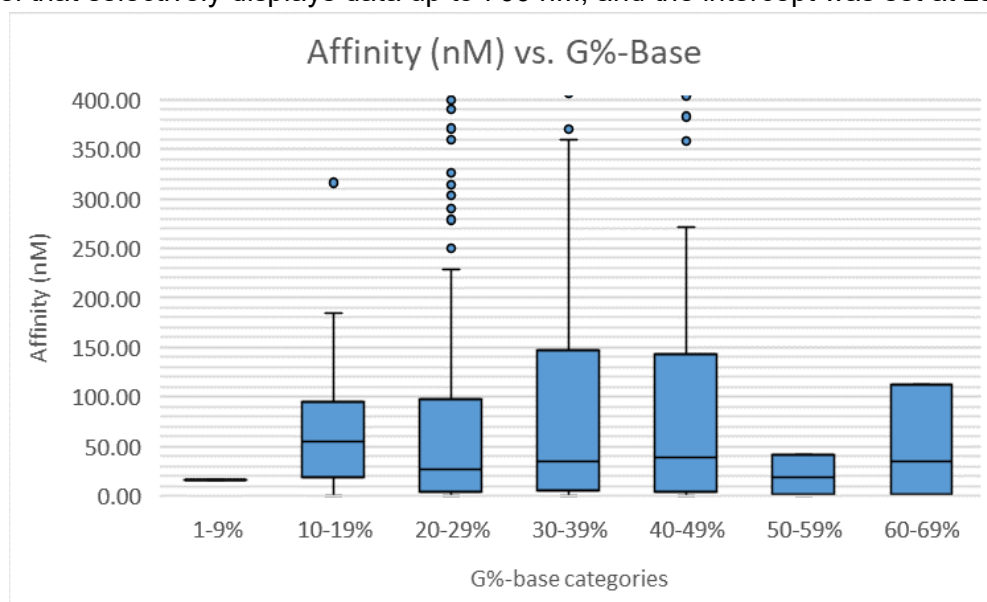

Figure S13: Aptamer binding affinity in nM vs. G% (boxplot). There are six G% categories to assess whether the specific range of G% affects affinity. Categories 1-9%, 50-59%, and 60-69% have less than 20 sample sizes. The y-axis was adjusted to a zoom level that selectively displays data up to 400 nM.

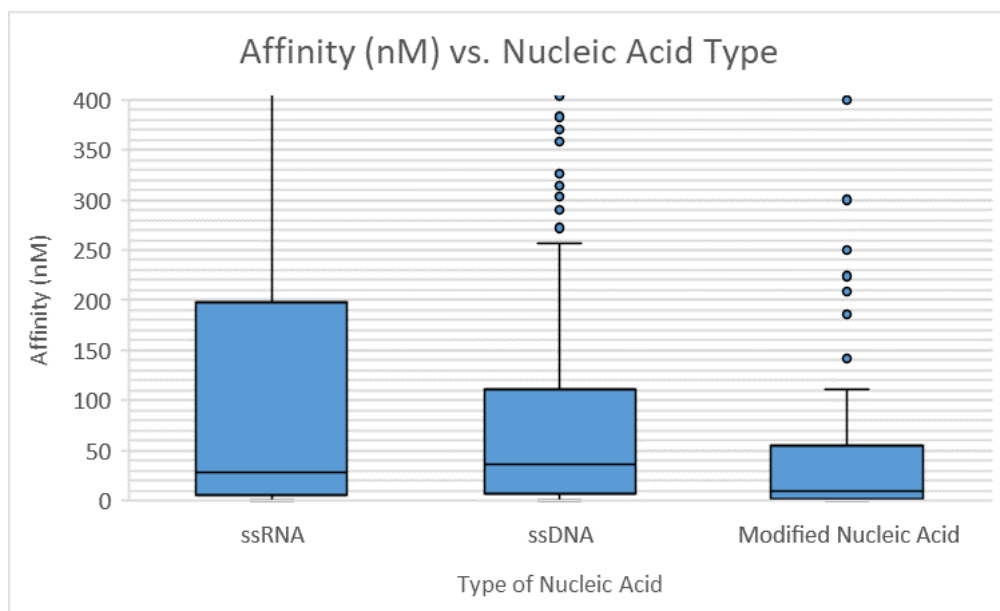

Figure S14: Nucleic acid type versus aptamer affinity (boxplot).  
 The y-axis was adjusted to a zoom level that selectively displays data up to 400 nM.

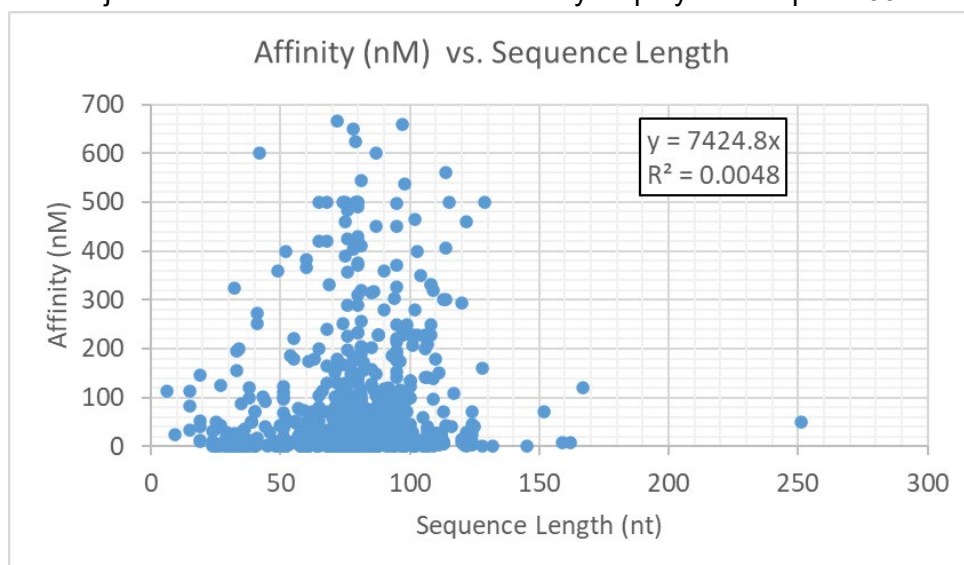

Figure S15: Aptamer binding affinity versus sequence length.  
 The relationship between these two variables is assessed using the line of best fit. With an  $R^2$  value of 0.0048, there is no correlation between the two variables. The y-axis was adjusted to a zoom level that selectively displays data up to 700 nM, and the intercept was set at zero.

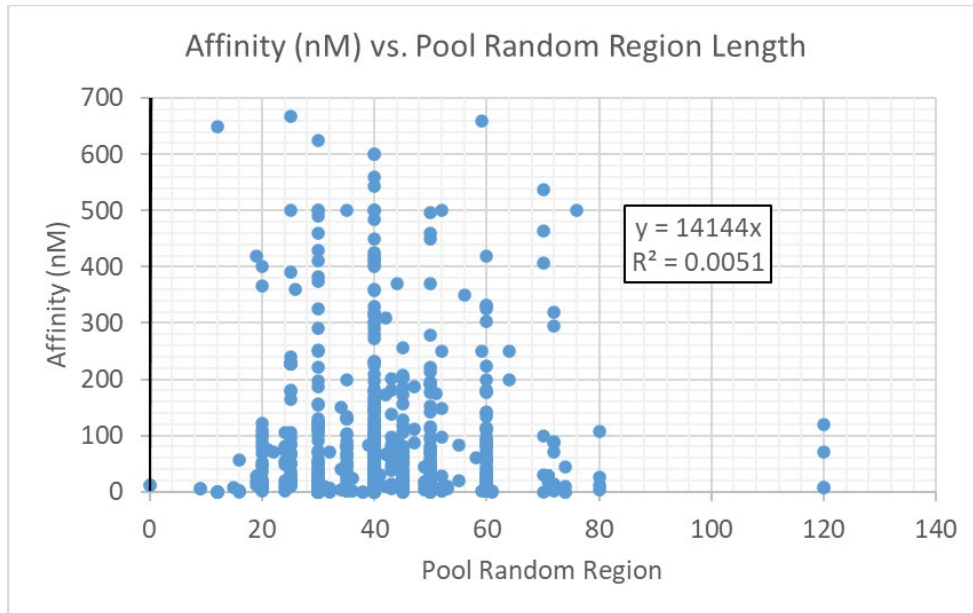

Figure S16: Aptamer binding affinity versus pool random region.

The relationship between these two variables is assessed using the line of best fit. With an  $R^2$  value of 0.0051, there is no correlation between the two variables. The y-axis was adjusted to a zoom level that selectively displays data up to 700 nM, and the intercept was set at zero.

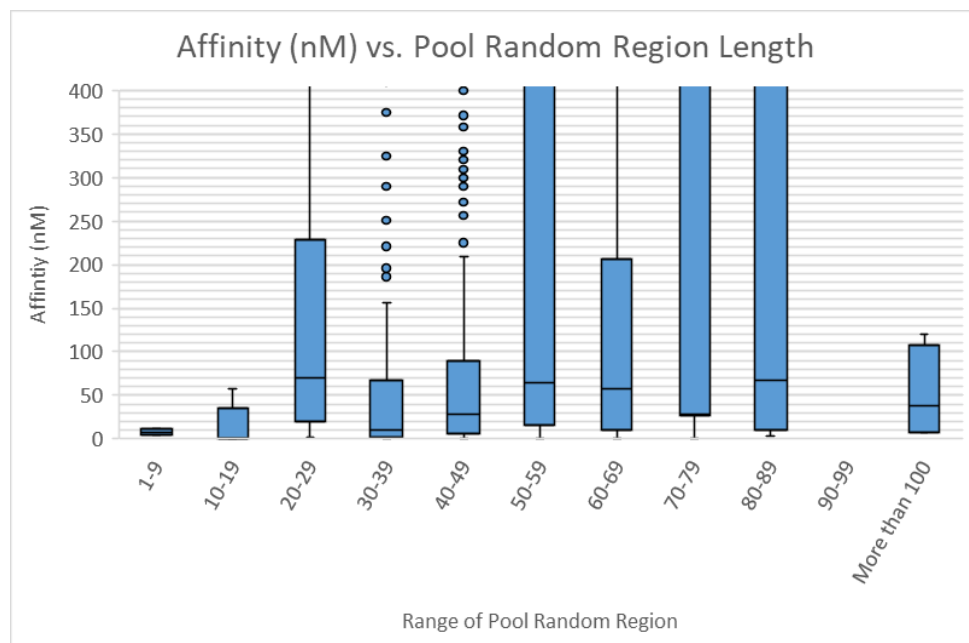

Figure S17: Length of pool random region versus aptamer affinity (boxplot).

Categories 1-9, 10-19, 80-89, 90-99, and more than 100 have less than 20 sample sizes. The y-axis was adjusted to zoom-in on the area around the boxplots, data up to 400 nM displayed.

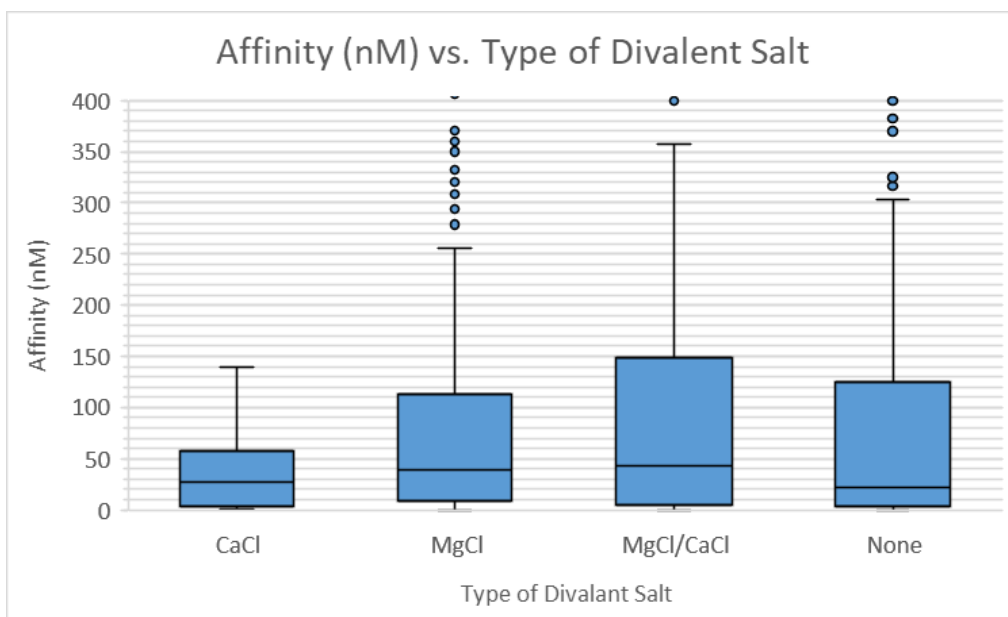

Figure S18: Divalent salt included in binding buffer versus aptamer affinity (boxplot). The y-axis was adjusted to a zoom level that selectively displays data up to 400 nM.

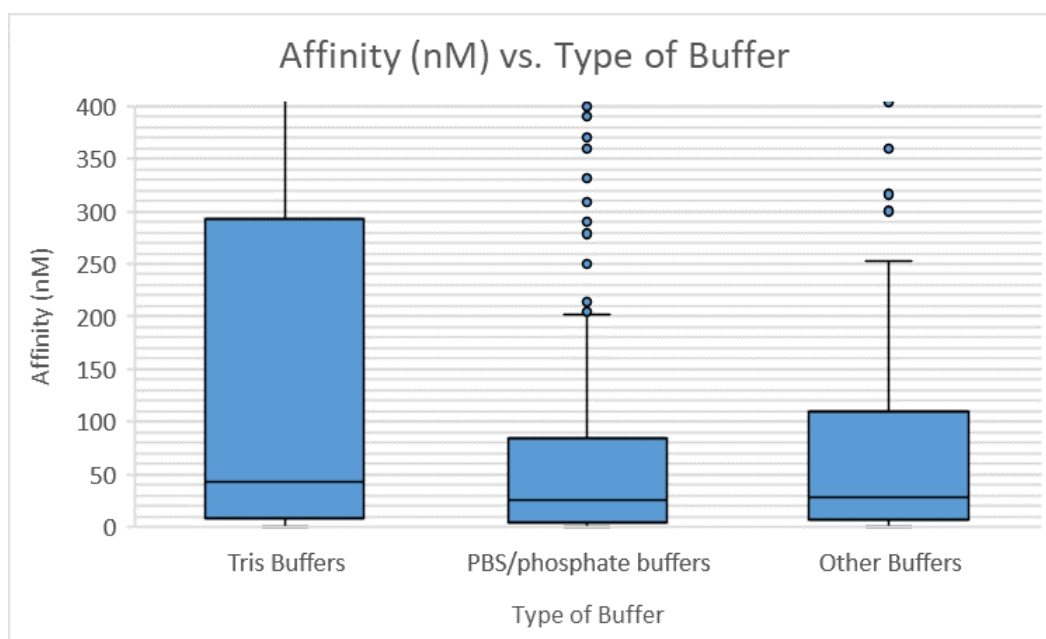

Figure S19: Buffer type versus aptamer binding affinity (boxplot). The y-axis was adjusted to zoom-in on the area around the boxplot, data up to 400 nM displayed.

| UTexas<br>DB Serial<br>Number<br>and<br>Citation                                                        | Aptamer Name, Target<br><br>Sequence Comparison                                                                                                                                                                                                                                   | Source of<br>Error                                                                                            |
|---------------------------------------------------------------------------------------------------------|-----------------------------------------------------------------------------------------------------------------------------------------------------------------------------------------------------------------------------------------------------------------------------------|---------------------------------------------------------------------------------------------------------------|
| # 10000063<br><br>Lorsch, J. R.,<br>& Szostak, J.<br>W. (1994).<br>Biochemistry,<br>33(4), 973-<br>982. | <b>35-mer aptamer, anti-Cobinamide dicyanide</b><br><br>UTexas: 5'GGAACCGGUGCGCAUAACCACCUCAGUGCGAGCAA3'<br>Apta-Index: 5'-----CCGGUGCGCAUAACCACCUCAGUGCGAGCAAGGAA3'                                                                                                               | Apta-Index<br>added GGAA<br>to wrong end                                                                      |
| # 10001000<br><br>Kwon, H. M.,<br>et al. (2014).<br>A PloS one,<br>9(5), e97574.                        | <b>HA12-16, anti-gHA1</b><br><br>UTexas: 5'GGGUUCACUGCAGACUUGACGAAGCUUGCUUGACGGAGAUCAAGGGCGAGUCGCAUACCAAGUUGAUGGGGAAUGGAUCCACAUCUACGAAUUC3'<br>Apta-Index: 5'GACAAGGATAAATCCTTCAATGAAGTGGGTCACTCATCTGTGA3'                                                                        | Apta-Index<br>reported an<br>entirely<br>different<br>sequence.                                               |
| # 10001063<br><br>Dong, L., et<br>al. (2015).<br>Scientific<br>reports, 5(1),<br>15552.                 | <b>AP273, anti-Alpha-fetoprotein (AFP)</b><br><br>UTexas:<br>5'GTGACGCTCCTAACGCTGACGTGACGCTCCTAACGCTGACTCAGGTGCAGTTCTCGACTCGGTCTTGATGTGGGTCTGTCCGTCCGAACCAATCCCTGTCCGTCCGAACCAATC3'<br>Apta-Index: 5'GTGACGCTCCTAACGCTGACTCAGGTGCAGTTCTCGACTCGGTCTTGATGTGGGTCTGTCCGTCCGAACCAATC3' | Both had<br>errors:<br>UTexas<br>duplicated<br>primer regions<br>and Apta-<br>Index deleted<br>an internal C. |
| #10001073<br><br>Li, P., et al.<br>(2015). BMC<br>Veterinary<br>Research,<br>11(1), 1-11.               | <b>QA-36, anti-Soft-shelled turtle iridovirus (STIV)</b><br><br>UTexas: 5'GACGCTTACTCAGGTGTGACTCGTGTGCGGGGAGGGGAGTGGCGCTGTTGGTGCGGGTATAGCGCGTGGTGTGCAAGGACGCAGAGAAGTCTC3'<br>5'-----TGTGCGGGGAGGGGAGTGGCGCTGTTGGTGCGGGTATAGCGCGTGGTGT-----3'<br>^ Apta-Index:                     | Apta-Index<br>deleted the<br>primer regions.                                                                  |

|                                                                                                        |                                                                                                                                                                                                                                     |                                     |
|--------------------------------------------------------------------------------------------------------|-------------------------------------------------------------------------------------------------------------------------------------------------------------------------------------------------------------------------------------|-------------------------------------|
| <p># 10001268</p> <p>Xiang, J., et al. (2019). Molecular Therapy- Nucleic Acids, 16, 302-312.</p>      | <p><b>BI-1, anti-BACE-1</b></p> <p>UTexas: 5' ATCCAGAGTGACGCAGCAAGCGATACTGCGTGGCTGGAGGCGGGTAGGGCCAGAGTTC TGGACACGGTGGCTTAGT3'</p> <p>Apta-Index: 5' AGCGATACTGCGTGGCTGGAGGCGGGTAGGGCCAGAGTTC3'</p>                                  | <p>UTexas added primer regions.</p> |
| <p># 10001297</p> <p>Diaz-Fernandez, A., et al. (2019). Biosensors and Bioelectronics, 128, 83-90.</p> | <p><b>PSA-1, anti-Prostate-specific antigen</b></p> <p>UTexas: 5' AGGGTTGATAGGTTAAGAGCGGACGGTTGCGCTATATTTAACCAAAAGTCTGGATTAACA CGATGTCAACTAGCTGTTGGG3'</p> <p>Apta-Index: 5' GGACGGTTGCGCTATATTTAACCAAAAGTCTGGATTAACA3'</p>         | <p>UTexas added primer regions.</p> |
| <p># 10001334</p> <p>Song, Z., et al. (2020). Molecules, 25(23), 5585.</p>                             | <p><b>CD63-1, anti- CD63 positive cells</b></p> <p>UTexas: 5' TAGGGAAGAGAAGGCATATGATTAACACGACAGACGTTCCGGAGTTCGAACCCCTGACAGCGTGGGCTTGACTAGTACATGACCACTTGA3'</p> <p>Apta-Index: 5' TAACACGACAGACGTTCCGGAGTTCGAACCCCTGACAGCGTGGG3'</p> | <p>UTexas added primer regions.</p> |
| <p># 10001339</p> <p>Kohlberger, M., et al. (2020). PLoS One, 15(11), e0241560.</p>                    | <p><b>C7, anti-Rituximab, anti-CD20 IgG1 antibody</b></p> <p>UTexas: 5' ATACCAGCTTATTCAATTGGCCATTGTGGACTTCTTTGGGTAATTCAGGGGCTCGATTAGATAGTAAGTGAATCT3'</p> <p>Apta-Index: 5' GGCCATTGTGGACTTCTTTGGGTAATTCAGGGGCTCGATT3'</p>          | <p>UTexas added primer regions.</p> |
| <p># 10001343</p> <p>Kohlberger, M., et al. (2020). PloS one, 15(11), e0241560.</p>                    | <p><b>C10, anti-Rituximab, anti-CD20 IgG1 antibody</b></p> <p>UTexas: 5' ATACCAGCTTATTCAACTACTTCGGCTAGTTAGGGGTAGTTTAGATCGTCTCTACATAGATAGTAAGTGAATCT3'</p> <p>Apta-Index: 5' ACTTCGGCTAGTTAGGGGTAGTTTAGATCGTCTCTACAT3'</p>           | <p>UTexas added primer regions.</p> |



|                                                                                         |                                                                                                                                                                                                                                                                                                                               |                                                                                                                              |
|-----------------------------------------------------------------------------------------|-------------------------------------------------------------------------------------------------------------------------------------------------------------------------------------------------------------------------------------------------------------------------------------------------------------------------------|------------------------------------------------------------------------------------------------------------------------------|
| <p># 10001348</p> <p>Chinnappan, R., et al. (2021). Talanta, 224, 121818.</p>           | <p><b>BC1, anti- Beta-crosslap (BC)</b></p> <p>UTexas: 5' <b>ATACCAGCTTATTC</b>AATTATGACGGGGTCTAGGCAAGTAATAACGGGGCAAGCTTTTCTATCTCGTTCTAGGGTA<b>AGATAGTAAGTGCAATCT</b>3'</p> <p>Apta-Index: 5' ATGACGGGGTCTAGGCAAGTAATAACGGGGCAAGCTTTTCTATCTCGTTCTAGGGTA3'</p>                                                                 | <p>UTexas added primer regions.</p>                                                                                          |
| <p># 10001349</p> <p>Zhu, C., et al. (2021). Talanta, 223(Pt 1), 121690.</p>            | <p><b>T-2, anti- Thyroglobulin (Tg)</b></p> <p>UTexas: 5' CCTAACCGATATCACACTCACCGGTGAGCGGGGAGGCGATGCCCAGGCTAACTTGACTCAGTTGGTCGTCATTGGAGTATC3'</p> <p>Apta-Index: 5' -----CGCGTGAGCGGGGAGGCGATGCCCAGGCTAACTTGACTCA-----3'</p>                                                                                                  | <p>Apta-Index deleted the primer regions.</p>                                                                                |
| <p># 10001358</p> <p>Yu, Q., et al. (2021). Journal of fish diseases, 44(1), 33–44.</p> | <p><b>GVI-7, anti-Grass carp reovirus (GCRV)-infected CIK cells</b></p> <p>UTexas: 5' GACGCTTACTCAGGTGTGACTCGTGAACCCACCTCAGGGCATCTTACATTTCTTCTAAGTTGTTACCATGTTTCGAAGGACGCAGATGAAGTCTC3'</p> <p>Apta-Index: 5' <b>GTCTGAAGTAGACCGCAGG</b>AGTGAACCCACCTCAGGGCATCTTACATTTCTTCTAAGTTGTTACCATGTT<b>TAGTCACACCTGAGTAAGCGT</b>3'</p> | <p>Apta-Index added incorrect primer regions (and paper has entirely different forward primer in folded aptamer, Fig 2).</p> |
| <p># 10001372</p> <p>Wu, H., et al. (2021). ACS omega, 6(5), 3771–3779.</p>             | <p><b>HPA-2, anti-Helicobacter pylori</b></p> <p>UTexas: 5' AAGGAGCAGCGTGGAGTTACCAGGAGGACCCATTCTCGTGTATCGACGAGATCCAGTGACCACGACGACACCCCTAA3'</p> <p>Apta-Index: 5' -----CCAGGAGGACCCATTCTCGTGTATCGACGAGATCCAGTG-----3'</p>                                                                                                     | <p>Apta-Index deleted the primer regions.</p>                                                                                |
| <p># 10001395</p> <p>Lorenzo-Gómez, R., et al. (2022). Analytica chimica acta,</p>      | <p><b>D1, anti- 16-amino acid peptide from collagen XIa1</b></p> <p>UTexas: 5' <b>ATACCAGCTTATTC</b>AATTTTTGGTTGACGGCAGTCGGCGGTATGCGCATATCGTGTGGTA<b>ACAATCGTAATCAGTTAG</b>3'</p> <p>Apta-Index: 5' GGTTGACGGCAGTCGGCGGTATGCGCATATCGTGTGGTA3'</p>                                                                             | <p>UTexas added primer regions.</p>                                                                                          |

|                                                                                                                               |                                                                                                                                                                                                                                                                 |                                                                 |
|-------------------------------------------------------------------------------------------------------------------------------|-----------------------------------------------------------------------------------------------------------------------------------------------------------------------------------------------------------------------------------------------------------------|-----------------------------------------------------------------|
| 1189,<br>339206.                                                                                                              |                                                                                                                                                                                                                                                                 |                                                                 |
| # 10000117<br><br>Xu, W., &<br>Ellington, A.<br>D. (1996).<br>PNAS<br>93(15),<br>7475–748                                     | <b>C2, anti-HIV-1 Rev</b><br><br>UTexas:<br>5' <b>UCUAAUACGACUCACUUAUGGGAGAGACAAGCUUGGGUC</b> UCGACCUCGCGCAGGAGGGUGGAGGGUCGUAGAGCGCGUA <b>AGAAGAGAAAAGAGAAGUAAUUAAGGAUCCUCAC</b> 3'<br>Apta-Index: 5' GGAGGUCGACCUCGCGCAGGAGGGUGGAGGGUCGUAGAGCGCGUAGGAGG3'      | UTexas added<br>primer regions<br>rather than<br>motif regions. |
| # 10000358<br><br>Proske, D., et<br>al. (2002).<br>The Journal<br>of biological<br>chemistry,<br>277(13),<br>11416–<br>11422. | <b>DP3, anti-Neuropeptide Y</b><br><br>UTexas: 5' UCGGAGAAAGGGAAGCUUGAGCAGCAGGAGGGCCGGCGUUAGGGUUAGCGAGCCGAUUGAAAGAAGAAGGAACGAGCGUACGGAUCCGAUC3'<br>Apta-Index: 5' -GGGAGAAAGGGAAGCUUGAGCAGCAGGAGGGCCGGCGUUAGGGUUAGCGAGCCGAUUGAAAGAAGAAGGAACGAGCGUACGGAUCCGAUC3' | Apta-Index<br>deleted one nt<br>and inserted<br>an extra G.     |
| # 10000392<br><br>Pileur, F., et<br>al. (2003).<br>Nucleic acids<br>research,<br>31(19),<br>5776–5788.                        | <b>VI-2, anti-Ribonuclease H1</b><br><br>UTexas: 5' <b>GCCTGTTGTGAGCCTCCTCTCGAA</b> CGGTCGCTCCGTGTGGCTTGGGTTGGGTGTGGCAGTGACT <b>TGAGCGTTTATTCTTGTCTCCC</b> 3'<br>Apta-Index: 5' CGGTCGCTCCGTGTGGCTTGGGTTGGGTGTGGCAGTGAC3'                                       | UTexas added<br>primer regions.                                 |
| # 10000645<br><br>Tang, Z., et<br>al. (2007).<br>Analytical<br>chemistry,<br>79(13),<br>4900–4907.                            | <b>TD05, anti-Ramos cells</b><br><br>UTexas: 5' <b>AAGGAGCAGCGTGGAGGATA</b> AACACCGTGGAGGATAGTTCGGTGGCTGTT <b>CAGGGTCTCCTCCC</b> GGT <b>TAGGGTGTGTCTCGTGGT</b> 3'<br>Apta-Index: 5' AACACCGTGGAGGATAGTTCGGTGGCTGTT <b>CAGGGTCTCCTCCC</b> GGT3'                  | UTexas added<br>primer regions.                                 |

|                                                                                                                    |                                                                                                                                                                                                                                                                                                   |                                                                                      |
|--------------------------------------------------------------------------------------------------------------------|---------------------------------------------------------------------------------------------------------------------------------------------------------------------------------------------------------------------------------------------------------------------------------------------------|--------------------------------------------------------------------------------------|
| <p># 1000697</p> <p>Li, M., et al. (2008).<br/>Journal of the American Chemical Society, 130(38), 12636–12638.</p> | <p><b>85A, anti-Fibrinogen</b></p> <p>UTexas: 5' CCTTCGTTGTCTGCCTTCGTAGCGGATCGAATTACGCGTTAACGGCAACCGATAACGGGACCGATTGCACACCCTTCAGAATTCGCACCA3'<br/>Apta-Index: 5' CCTTCGTTGTCTGCCTTCGTAG<b>GACCCGACACATCGACGCAGGGAAATTCGGCAAGTCCAGCC</b>AAATGCCACCCTTCAGAATTCGCACCA3'</p>                          | <p>Apta-Index reported a different random region and the correct primer regions.</p> |
| <p># 1000800</p> <p>Savory, N., et al. (2010).<br/>Biosensors &amp; bioelectronics, 26(4), 1386–1391.</p>          | <p><b>PSap4#5, anti-Prostate specific antigen (PSA)</b></p> <p>UTexas: 5' CATGCTTACCTATAGTGAACTTTATTAGCCTCCCGGAAGAGCACCTCTTTCATGCTTACCTATAGTGAAC3'<br/>Apta-Index: 5' <b>TTTTAATTAAAGCTCGCCATCAAATAGCTTT</b>3'</p>                                                                                | <p>Apta-Index reported the ΔPSap4#5 aptamer as PSap4#5</p>                           |
| <p># 1000885</p> <p>Song, KM, Jet al. Anal Bioanal Chem. 2012;402(6): 2153-2161.</p>                               | <p><b>AMP18, anti-Ampicillin</b></p> <p>UTexas: 5' <b>CACCTAATACGACTCACTATAGCGGATCCGA</b>-TTAGTTGGGGTTCAGTT<b>GCTGGCTCGAACAAGCTTGC</b>3'<br/>Apta-Index: 5' TTTAGTTGGGGTTCAGTTG3'</p>                                                                                                             | <p>UTexas added primer regions and deleted a T nucleotide.</p>                       |
| <p># 1000899</p> <p>Woo, H. M., et al. (2013).<br/>Antiviral research, 100(2), 337–345.</p>                        | <p><b>NS1 aptamer, anti-Influenza virus non-structural protein 1 (NS1) protein</b></p> <p>UTexas: 5' GCAATGGTACGGTACTTCCGCGGTCCGGGGTGGGTGGGTGGGGGTGCGGG-----CAAAGTGCACGCTACTTTGCTAA3'<br/>Apta-Index: 5' GCAATGGTACGGTACTTCCGCGGTCCGGGGTGGGTGGGTGGGGGTGCGGGGGGCGGCCGCAAAGTGCACGCTACTTTGCTAA3'</p> | <p>UTexas deleted 10 nucleotides.</p>                                                |

|                                                                                                                             |                                                                                                                                                                                                                                                                                                                        |                                                                                               |
|-----------------------------------------------------------------------------------------------------------------------------|------------------------------------------------------------------------------------------------------------------------------------------------------------------------------------------------------------------------------------------------------------------------------------------------------------------------|-----------------------------------------------------------------------------------------------|
| <p># 10000918</p> <p>Eissa, S., et al. (2013). Analytical chemistry, 85(24), 11794–11801.</p>                               | <p><b>OA34, anti-Okadaic acid (OA)</b></p> <p>UTexas: 5' ATACCAGCTTATTC AATTGGTCACCAACAACAGGGAGCGCTACGCGAAGGGTCAATGTGACGTCATGCGGATGTGTGGAGATAGTAAGTGAATCT3'</p> <p>Apta-Index: 5' GGTACCAACAACAGGGAGCGCTACGCGAAGGGTCAATGTGACGTCATGCGGATGTGTGG3'</p>                                                                    | <p>UTexas added primer regions.</p>                                                           |
| <p># 10000968</p> <p>Yang, M., et al. (2013). Sensors (Basel, Switzerland), 13(5), 6865–6881.</p>                           | <p><b>Apt22, anti- Salmonella Paratyphi A</b></p> <p>UTexas: 5' GAATTCAGTCGGACAGCGATGGACGAATATCGTCTCCAGTGAATTCAGTCGGACAGCGGATGGACGAATATCGTCTCCC3'</p> <p>Apta-Index: 5' ATGGACGAATATCGTCTCCAGTGAATTCAGTCGGACAGCG3'</p>                                                                                                 | <p>Sequence from the paper is unclear (i.e., unclear if primer regions are added or not).</p> |
| <p># 10000981</p> <p>Xu, D., et al. (2014). Nucleic acid therapeutics, 24(3), 226–238.</p>                                  | <p><b>AptER-1, anti-Estrogen receptor alpha (ER<math>\alpha</math>)</b></p> <p>UTexas: 5' GGGCAGAGGCACCGCGAACAACGCAAGACAGAGUGCCGACAAGAGCACAAGCUUCUGCCC3'</p> <p>Apta-Index: 5' GGGCAGACCGCACC CGCAACAACGCAAGACAGAGUGCCGACAAGAGCACAAGCUUCUGCCC3'</p>                                                                    | <p>Apta-Index introduced a mutation (changed C to G)</p>                                      |
| <p># 10000795</p> <p>Chang, T. W., et al. (2010). Biochemical and biophysical research communications, 396(4), 854–860.</p> | <p><b>S132B-C22, anti-Light chain of type A botulinum neurotoxin (BoNT/A) (LCA)</b></p> <p>UTexas: 5' GGGAGGAGGAGAGAUGUGAACUUGACAGCGUGCCUAGAAGUCCAAGCUUAAAUAACCACGCUAGCAGAAACUCUACACUGGACUGGCG3'</p> <p>Apta-Index: 5' GGGAGGAGGAGAGATGTGAAC TTGACAGCGUGCCUAGAAGUCCAAGCUUAAAUAACCACGCUAGCAGAAACTCTACACTGGACTGGCG3'</p> | <p>Apta-Index included T's, instead of U's for an RNA Aptamer</p>                             |

|                                                                                         |                                                                                                                                                                                                                                                                                                                        |                                                      |
|-----------------------------------------------------------------------------------------|------------------------------------------------------------------------------------------------------------------------------------------------------------------------------------------------------------------------------------------------------------------------------------------------------------------------|------------------------------------------------------|
| <p># 10001357</p> <p>Yu, Q., et al. (2021). Journal of fish diseases, 44(1), 33–44.</p> | <p>GVI-1, anti-Grass carp reovirus (GCRV)-infected CIK cells</p> <p>UTexas: 5'GACGCTTACTCAGGTGTGACTCGGGGTGTAGCTCGTTATGATTTCGGACAAGACTTACCTTGCGCCTCTGGGATCGAAGGACGCAGATGAAGTCTC3'</p> <p>Apta-Index: 5'<b>GTCTGAAGTAGACCGCAGG</b>AGGGGTGTAGCTCGTTATGATTTCGGACAAGACTTACCTTGCGCCTCTGGGAT<b>AGTCACACCTGAGTAAGCGT</b>3'</p> | <p>Apta-Index recorded incorrect primer regions.</p> |
|-----------------------------------------------------------------------------------------|------------------------------------------------------------------------------------------------------------------------------------------------------------------------------------------------------------------------------------------------------------------------------------------------------------------------|------------------------------------------------------|

Table S3: Comparison of Aptamer Databases: Examination of those sequences that differed.

When comparing the established Apta-Index to the UTexas Aptamer Database, we found 90 aptamer sequences in common between the two. Of the 27 that were different, we examined the source of the differences to build our internal training practices when extracting sequence information from the literature.
